# Supplementary material for: Complementary and Alternative Medicine Use in Modern Obstetrics: A Survey of the Central Association of Obstetricians & Gynecologists Members
Source: PubMed Central journal article supplement — J Evid Based Complementary Altern Med. 2016 Oct 5;22(3):429–35. doi: 10.1177/2156587216671215 (PMC5871154; doi:10.1177/2156587216671215), 2016-10-05
Supplement: 671215_Supplement.pdf [file 671215_Supplement.pdf]

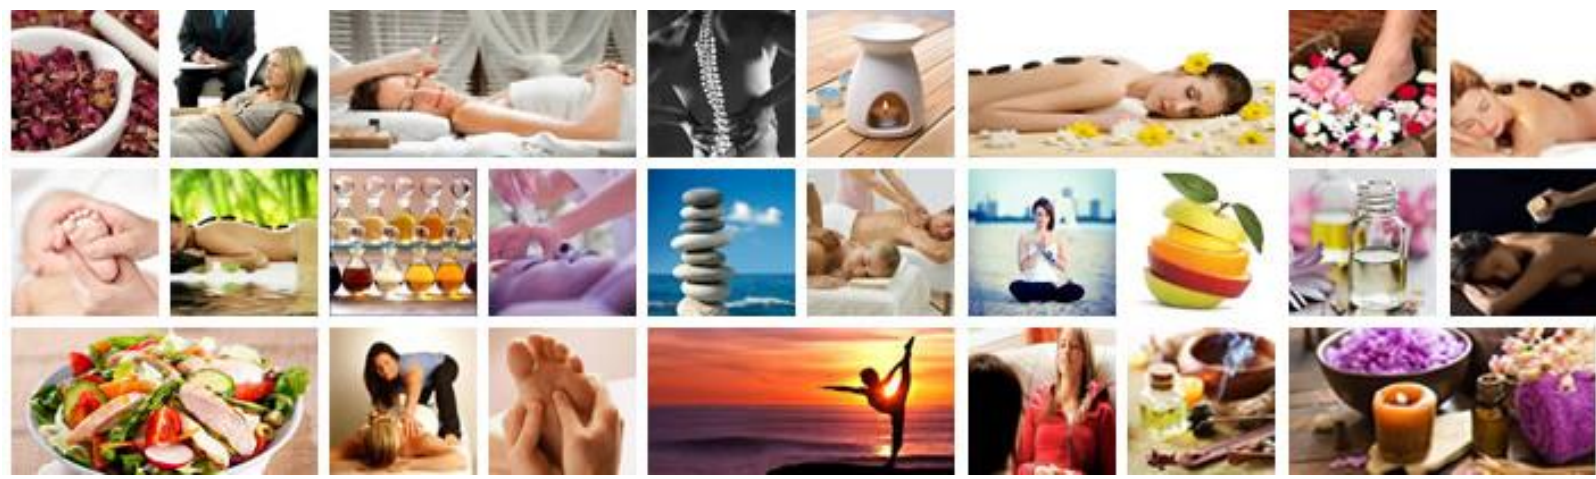

# Complementary and Alternative Medicine Use in Modern Obstetrics: A survey of CAOG members

The National Center for Complementary and Alternative Medicine (NCCAM) defines complementary and alternative medicine as an array of health care approaches with a history of use or origins outside of mainstream medicine such as:

### Natural Products

- Botanicals
- Herbs
- Probiotics
- Vitamins and minerals

### Mind and body practices

- Acupuncture
- Acupressure
- Aromatherapy
- Healing touch
- Hypnotherapy
- Massage therapy
- Meditation
- Movement therapies
- Qi gong
- Relaxation techniques
- Spinal manipulation
- Tai chi
- Yoga

### Other Approaches

- Ayurvedic medicine
- Homeopathy
- Naturopathy
- Traditional healers

**Thank you for participating in this research study. Please complete this voluntary survey if you have not completed this online prior to today and return to registration desk upon completion.**

**The survey should take approximately 5-10 minutes to complete.**

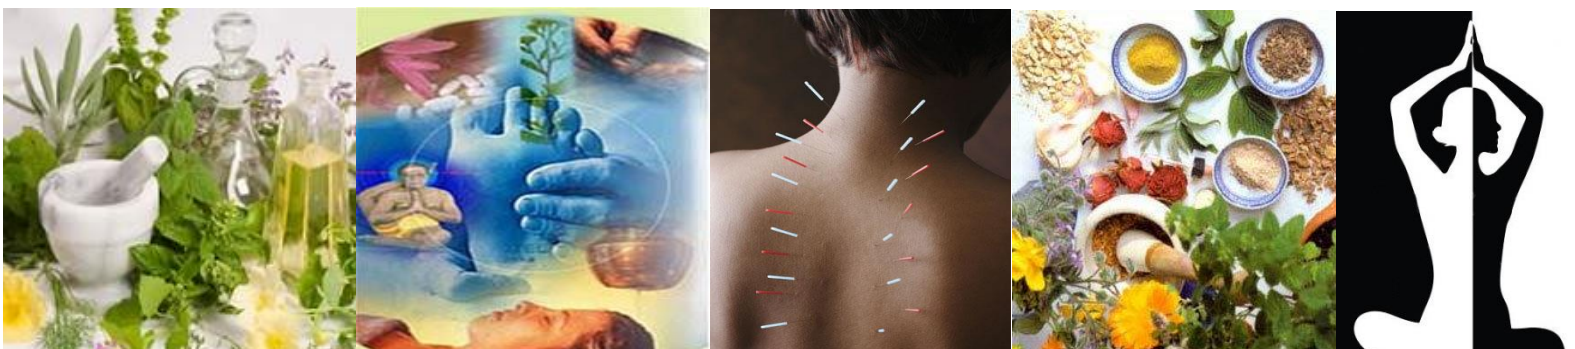

**DEMOGRAPHICS**

**What is your sex? (circle one)**

Male

Female

**What is your current status? (check one):**

Medical Student

OBGYN Resident

MFM Fellow

REI Fellow

Gyn Onc Fellow

Urogyn Fellow

Board certified General OB/GYN

Board certified Reproductive Endocrinologist

Board certified Gynecology Oncologist

Board certified Urogynecologist

Board certified Maternal- Fetal Medicine Specialist

Other \_\_\_\_\_

**Please specify the total number of years you have**

**practiced obstetrics after completion of residency.** \_\_\_\_\_ years

**What is your ethnicity?**

Caucasian  African American Hispanic Asian  Multi-racial Other:\_\_\_\_\_

**In what state(s) do you currently practice obstetrics? [Please write the full name of the state(s)]**

\_\_\_\_\_

**Do you currently have midwives integrated into your obstetric practice?**

Yes

No

**PERSONAL COMPLEMENTARY AND ALTERNATIVE MEDICINE (CAM) USE**

**Have you personally used any Complementary and Alternative Medicine for your own health in the past 5 years?**

No

Yes, please specify: \_\_\_\_\_

**If female, did you ever use Complementary and Alternative Medicine during a pregnancy?**

Male/ Never been pregnant

No

Yes, please specify: \_\_\_\_\_

**Have you received any training beyond medical school or residency on the use of Complementary and Alternative Medicine (ie. Yoga, acupuncture, acupressure, hypnotherapy etc.)?**

No

Yes, please specify: \_\_\_\_\_

**Do you routinely query your pregnant patients about their use of CAM during the pregnancy?**

No

Yes

Have you ever prescribed, referred or advised the use of any Complementary and Alternative Medicine to your pregnant patients?

No

Please indicate the reason for **not** using CAM (check all that apply):

- Not enough evidence on the efficacy of CAM during pregnancy
- Not enough evidence on the safety of CAM during pregnancy
- No training in the use of CAM during pregnancy
- Bad patient experience with previous CAM use during pregnancy
- Conventional medicine is sufficient for the management of pregnancy
- Other (please specify): \_\_\_\_\_

Yes

What sources of information do you use to find out about CAM use in pregnancy? (check all that apply):

- ACOG resources
- Peer reviewed journal articles
- Professional colleagues
- Personal experience
- Others (please specify): \_\_\_\_\_
- Family and friends
- CAM providers
- Magazines/Television
- Internet (non-medical sites)

**EFFECTIVENESS OF COMPLEMENTARY AND ALTERNATIVE MEDICINE IN PREGNANCY**

For each modality of CAM, please indicate how **effective** you believe each modality is for your pregnant patients.

| MODALITY                     | HIGHLY EFFECTIVE         | MODERATELY EFFECTIVE     | OCCASIONALLY EFFECTIVE   | NOT EFFECTIVE            | HARMFUL                  | NOT FAMILIAR WITH MODALITY |
|------------------------------|--------------------------|--------------------------|--------------------------|--------------------------|--------------------------|----------------------------|
| Acupuncture                  | <input type="checkbox"/>   |
| Acupressure                  | <input type="checkbox"/>   |
| Aromatherapy                 | <input type="checkbox"/>   |
| Biofeedback                  | <input type="checkbox"/>   |
| Black cohosh                 | <input type="checkbox"/>   |
| Chiropractic                 | <input type="checkbox"/>   |
| Ginger                       | <input type="checkbox"/>   |
| Homeopathy                   | <input type="checkbox"/>   |
| Hypnosis/Guided imagery      | <input type="checkbox"/>   |
| Massage therapy              | <input type="checkbox"/>   |
| Meditation                   | <input type="checkbox"/>   |
| Music therapy                | <input type="checkbox"/>   |
| Reflexology                  | <input type="checkbox"/>   |
| Traditional Chinese medicine | <input type="checkbox"/>   |
| Yoga                         | <input type="checkbox"/>   |
| Other (specify) :            | <input type="checkbox"/>   |

## USE OF COMPLEMENTARY AND ALTERNATIVE MEDICINE IN PREGNANCY

Please indicate your level of agreement for each of the following statements.

|                                                                                                           | Strongly agree           | Agree                    | Neutral                  | Disagree                 | Strongly disagree        |
|-----------------------------------------------------------------------------------------------------------|--------------------------|--------------------------|--------------------------|--------------------------|--------------------------|
| Acupuncture can treat nausea in pregnancy.                                                                | <input type="checkbox"/> |
| Acupuncture can reduce low back pain during pregnancy.                                                    | <input type="checkbox"/> |
| Acupuncture can be used for induction of labor.                                                           | <input type="checkbox"/> |
| Acupuncture can decrease the length of labor.                                                             | <input type="checkbox"/> |
| Acupressure can treat nausea in pregnancy.                                                                | <input type="checkbox"/> |
| Fish oil supplements containing omega 3 fatty acids can lower the risk of preterm birth.                  | <input type="checkbox"/> |
| Ginger (1 gm/day) can treat nausea in pregnancy.                                                          | <input type="checkbox"/> |
| Heavy licorice consumption (>500 mg/kg) can double the risk of preterm birth.                             | <input type="checkbox"/> |
| Hypnosis during labor is an effective method to reduce the need for anesthesia /pain relief during labor. | <input type="checkbox"/> |
| Hypnosis with tocolytic therapy is more beneficial in reducing preterm birth than tocolytics alone.       | <input type="checkbox"/> |
| Massage therapy during labor can reduce labor pain.                                                       | <input type="checkbox"/> |
| Massage therapy during labor can reduce the length of labor.                                              | <input type="checkbox"/> |
| Moxibustion can turn a breech baby to a vertex position.                                                  | <input type="checkbox"/> |
| Moxibustion can cause fetal distress.                                                                     | <input type="checkbox"/> |
| Yoga can reduce low back pain in pregnancy.                                                               | <input type="checkbox"/> |
| Yoga can improve sleep during pregnancy.                                                                  | <input type="checkbox"/> |
| Yoga can reduce pain during labor.                                                                        | <input type="checkbox"/> |

**USE OF COMPLEMENTARY AND ALTERNATIVE MEDICINE IN PREGNANCY**

**Please indicate your level of agreement for each of the following statements.**

|                                                                                                                                                                 | <b>Strongly<br/>agree</b> | <b>Agree</b>             | <b>Neutral</b>           | <b>Disagree</b>          | <b>Strongly<br/>disagree</b> |
|-----------------------------------------------------------------------------------------------------------------------------------------------------------------|---------------------------|--------------------------|--------------------------|--------------------------|------------------------------|
| <b>Clinical care should integrate the best conventional and CAM practices.</b>                                                                                  | <input type="checkbox"/>  | <input type="checkbox"/> | <input type="checkbox"/> | <input type="checkbox"/> | <input type="checkbox"/>     |
| <b>Irrespective of personal beliefs, health care professionals should have knowledge about commonly used CAM methods.</b>                                       | <input type="checkbox"/>  | <input type="checkbox"/> | <input type="checkbox"/> | <input type="checkbox"/> | <input type="checkbox"/>     |
| <b>While a few CAM approaches may have limited health benefits, they have no true impact on treatment of symptoms, conditions and/or diseases of pregnancy.</b> | <input type="checkbox"/>  | <input type="checkbox"/> | <input type="checkbox"/> | <input type="checkbox"/> | <input type="checkbox"/>     |
| <b>There is value in Complementary and Alternative Medicine use in pregnancy.</b>                                                                               | <input type="checkbox"/>  | <input type="checkbox"/> | <input type="checkbox"/> | <input type="checkbox"/> | <input type="checkbox"/>     |
| <b>Health care professional should receive formal training in medical school about CAM methods that can be used during pregnancy.</b>                           | <input type="checkbox"/>  | <input type="checkbox"/> | <input type="checkbox"/> | <input type="checkbox"/> | <input type="checkbox"/>     |

This study is being conducted by:  
**Shilpa Babbar, MD**  
**Maternal-Fetal Medicine fellow**  
**University of Missouri Kansas City**  
**2301 Holmes Street**  
**Kansas City, MO 64108**  
**Email: [Babbarsh@umkc.edu](mailto:Babbarsh@umkc.edu)**

**UMKC IRB EXEMPTION #: 14-419**

**Thank you for your participation! 😊**
