# Supplementary material for: Complementary and Alternative Medicine Use in Modern Obstetrics: A Survey of the Central Association of Obstetricians & Gynecologists Members
Source: PubMed Central journal article supplement — J Evid Based Complementary Altern Med. 2016 Oct 5;22(3):429–35. doi: 10.1177/2156587216671215 (PMC5871154; doi:10.1177/2156587216671215), 2016-10-05
Supplement: SupplementalTable1_215.pdf [file SupplementalTable1_215.pdf]

**Supplemental table 1: Overall response to statements derived from ACOG on specific use of CAM in pregnancy**

| Statement                                                                                                 | Strongly agree<br>N (%) | Agree<br>N (%) | Neutral<br>N (%) | Disagree<br>N (%) | Strongly disagree<br>N (%) | Median<br>(SIQ) |
|-----------------------------------------------------------------------------------------------------------|-------------------------|----------------|------------------|-------------------|----------------------------|-----------------|
| Acupuncture can treat nausea in pregnancy.                                                                | 3 (2.3)                 | 55 (43.0)      | 54 (42.2)        | 10 (7.8)          | 2 (1.6)                    | 3 (0.5)         |
| Acupuncture can reduce low back pain during pregnancy.                                                    | 2 (1.6)                 | 67 (52.3)      | 47 (36.7)        | 5 (3.9)           | 2 (1.6)                    | 2 (0.5)         |
| Acupuncture can be used for induction of labor.                                                           | 0                       | 9 (7.0)        | 58 (45.3)        | 46 (35.9)         | 11 (8.6)                   | 3 (0.5)         |
| Acupuncture can decrease the length of labor.                                                             | 1 (0.8)                 | 8 (6.3)        | 60 (46.9)        | 46 (35.9)         | 7 (5.5)                    | 3 (0.5)         |
| <i>Acupressure</i> can treat nausea in pregnancy.                                                         | 3 (2.3)                 | 45 (35.2)      | 58 (45.3)        | 14 (10.9)         | 3 (2.3)                    | 3 (0.5)         |
| Fish oil supplements containing omega 3 fatty acids can lower the risk of preterm birth.                  | 0                       | 15 (11.7)      | 55 (43.0)        | 44 (34.4)         | 10 (7.8)                   | 3 (0.5)         |
| Ginger (1 gm/day) can treat nausea in pregnancy.                                                          | 12 (9.4)                | 72 (56.3)      | 33 (25.8)        | 5 (3.9)           | 2 (1.6)                    | 2 (0.5)         |
| Heavy licorice consumption (>500 mg/kg) can double the risk of preterm birth.                             | 0                       | 15 (11.7)      | 85 (66.4)        | 19 (14.8)         | 5 (3.9)                    | 3 (0)           |
| Hypnosis during labor is an effective method to reduce the need for anesthesia /pain relief during labor. | 9 (7.0)                 | 58 (45.3)      | 43 (33.6)        | 11 (8.6)          | 3 (2.3)                    | 2 (0.5)         |
| Hypnosis with tocolytic therapy is more beneficial in reducing preterm birth than tocolytics alone.       | 0                       | 6 (4.7)        | 72 (56.3)        | 39 (30.5)         | 7 (5.5)                    | 3 (0.5)         |
| Massage therapy during labor can reduce labor pain.                                                       | 8 (6.3)                 | 80 (62.5)      | 29 (22.7)        | 5 (3.9)           | 2 (1.6)                    | 2 (0.5)         |
| Massage therapy during labor can reduce the length of labor.                                              | 4 (3.1)                 | 17 (13.3)      | 73 (57.0)        | 25 (19.5)         | 5 (3.9)                    | 3 (0)           |
| Moxibustion can turn a breech baby to a vertex position.                                                  | 2 (1.6)                 | 10 (7.8)       | 46 (35.9)        | 45 (35.2)         | 18 (14.1)                  | 4 (0.5)         |
| Moxibustion can cause fetal distress.                                                                     | 0                       | 7 (5.5)        | 84 (65.6)        | 25 (19.5)         | 5 (3.9)                    | 3 (0.3)         |
| Yoga can reduce low back pain in pregnancy.                                                               | 22 (17.2)               | 75 (58.6)      | 24 (18.8)        | 2 (1.6)           | 1 (0.8)                    | 2 (0)           |
| Yoga can improve sleep during pregnancy.                                                                  | 23 (18.0)               | 69 (53.9)      | 30 (23.4)        | 1 (0.8)           | 1 (0.8)                    | 2 (0.5)         |
| Yoga can reduce pain during labor.                                                                        | 13 (10.2)               | 56 (43.8)      | 47 (36.7)        | 5 (3.9)           | 3 (2.3)                    | 2 (0.5)         |

Median Scale: 1 = Strongly Agree, 2 = Agree, 3= Neutral, 4= Disagree, 5 = Strongly Disagree
